# Supplementary material
Source: PubMed Central journal article supplement (PMC4223496)
Supplement: supp_M114.038505_mcp.M114.038505-1.pdf [file supp_M114.038505_mcp.M114.038505-1.pdf]

Rerun using options

Create Sublist

## 83 Cluster(s)

[Download File](#)

| Annotation Cluster 1     |                 | Enrichment Score: 21.41                  |    |  | Count | P_Value | Benjamini |
|--------------------------|-----------------|------------------------------------------|----|--|-------|---------|-----------|
| <input type="checkbox"/> | UP_SEQ_FEATURE  | glycosylation site:N-linked (GlcNAc...)  | RT |  | 101   | 1.7E-34 | 1.3E-31   |
| <input type="checkbox"/> | SP_PIR_KEYWORDS | <a href="#">glycoprotein</a>             | RT |  | 101   | 5.2E-33 | 1.4E-30   |
| <input type="checkbox"/> | SP_PIR_KEYWORDS | <a href="#">signal</a>                   | RT |  | 85    | 4.2E-29 | 5.9E-27   |
| <input type="checkbox"/> | UP_SEQ_FEATURE  | signal peptide                           | RT |  | 85    | 6.7E-29 | 2.6E-26   |
| <input type="checkbox"/> | SP_PIR_KEYWORDS | <a href="#">disulfide bond</a>           | RT |  | 58    | 1.3E-12 | 9.3E-11   |
| <input type="checkbox"/> | SP_PIR_KEYWORDS | <a href="#">transmembrane</a>            | RT |  | 70    | 1.4E-8  | 4.2E-7    |
| <input type="checkbox"/> | UP_SEQ_FEATURE  | transmembrane region                     | RT |  | 69    | 2.7E-8  | 3.5E-6    |
| Annotation Cluster 2     |                 | Enrichment Score: 13.84                  |    |  | Count | P_Value | Benjamini |
| <input type="checkbox"/> | SP_PIR_KEYWORDS | <a href="#">cell adhesion</a>            | RT |  | 27    | 1.0E-16 | 1.0E-14   |
| <input type="checkbox"/> | GOTERM_BP_FAT   | <a href="#">cell adhesion</a>            | RT |  | 34    | 1.5E-15 | 2.0E-12   |
| <input type="checkbox"/> | GOTERM_BP_FAT   | <a href="#">biological adhesion</a>      | RT |  | 34    | 1.6E-15 | 1.0E-12   |
| <input type="checkbox"/> | KEGG_PATHWAY    | <a href="#">ECM-receptor interaction</a> | RT |  | 14    | 1.7E-10 | 1.5E-8    |
| Annotation Cluster 3     |                 | Enrichment Score: 7.04                   |    |  | Count | P_Value | Benjamini |
| <input type="checkbox"/> | UP_SEQ_FEATURE  | topological domain:Cytoplasmic           | RT |  | 61    | 1.7E-11 | 4.4E-9    |
| <input type="checkbox"/> | SP_PIR_KEYWORDS | <a href="#">membrane</a>                 | RT |  | 84    | 7.1E-10 | 4.0E-8    |
| <input type="checkbox"/> | UP_SEQ_FEATURE  | topological domain:Extracellular         | RT |  | 50    | 2.1E-9  | 3.2E-7    |
| <input type="checkbox"/> | SP_PIR_KEYWORDS | <a href="#">transmembrane</a>            | RT |  | 70    | 1.4E-8  | 4.2E-7    |
| <input type="checkbox"/> | UP_SEQ_FEATURE  | transmembrane region                     | RT |  | 69    | 2.7E-8  | 3.5E-6    |
| <input type="checkbox"/> | GOTERM_CC_FAT   | <a href="#">intrinsic to membrane</a>    | RT |  | 79    | 1.5E-3  | 1.6E-2    |
| <input type="checkbox"/> | GOTERM_CC_FAT   | <a href="#">integral to membrane</a>     | RT |  | 75    | 4.0E-3  | 3.6E-2    |
| Annotation Cluster 4     |                 | Enrichment Score: 6.24                   |    |  | Count | P_Value | Benjamini |
| <input type="checkbox"/> | SP_PIR_KEYWORDS | <a href="#">lysosome</a>                 | RT |  | 13    | 1.4E-9  | 6.5E-8    |
| <input type="checkbox"/> | KEGG_PATHWAY    | <a href="#">Lysosome</a>                 | RT |  | 12    | 9.7E-7  | 2.1E-5    |
| <input type="checkbox"/> | GOTERM_CC_FAT   | <a href="#">lysosome</a>                 | RT |  | 13    | 3.4E-6  | 1.5E-4    |
| <input type="checkbox"/> | GOTERM_CC_FAT   | <a href="#">lytic vacuole</a>            | RT |  | 13    | 3.4E-6  | 1.5E-4    |
| <input type="checkbox"/> | GOTERM_CC_FAT   | <a href="#">vacuole</a>                  | RT |  | 14    | 3.9E-6  | 1.3E-4    |

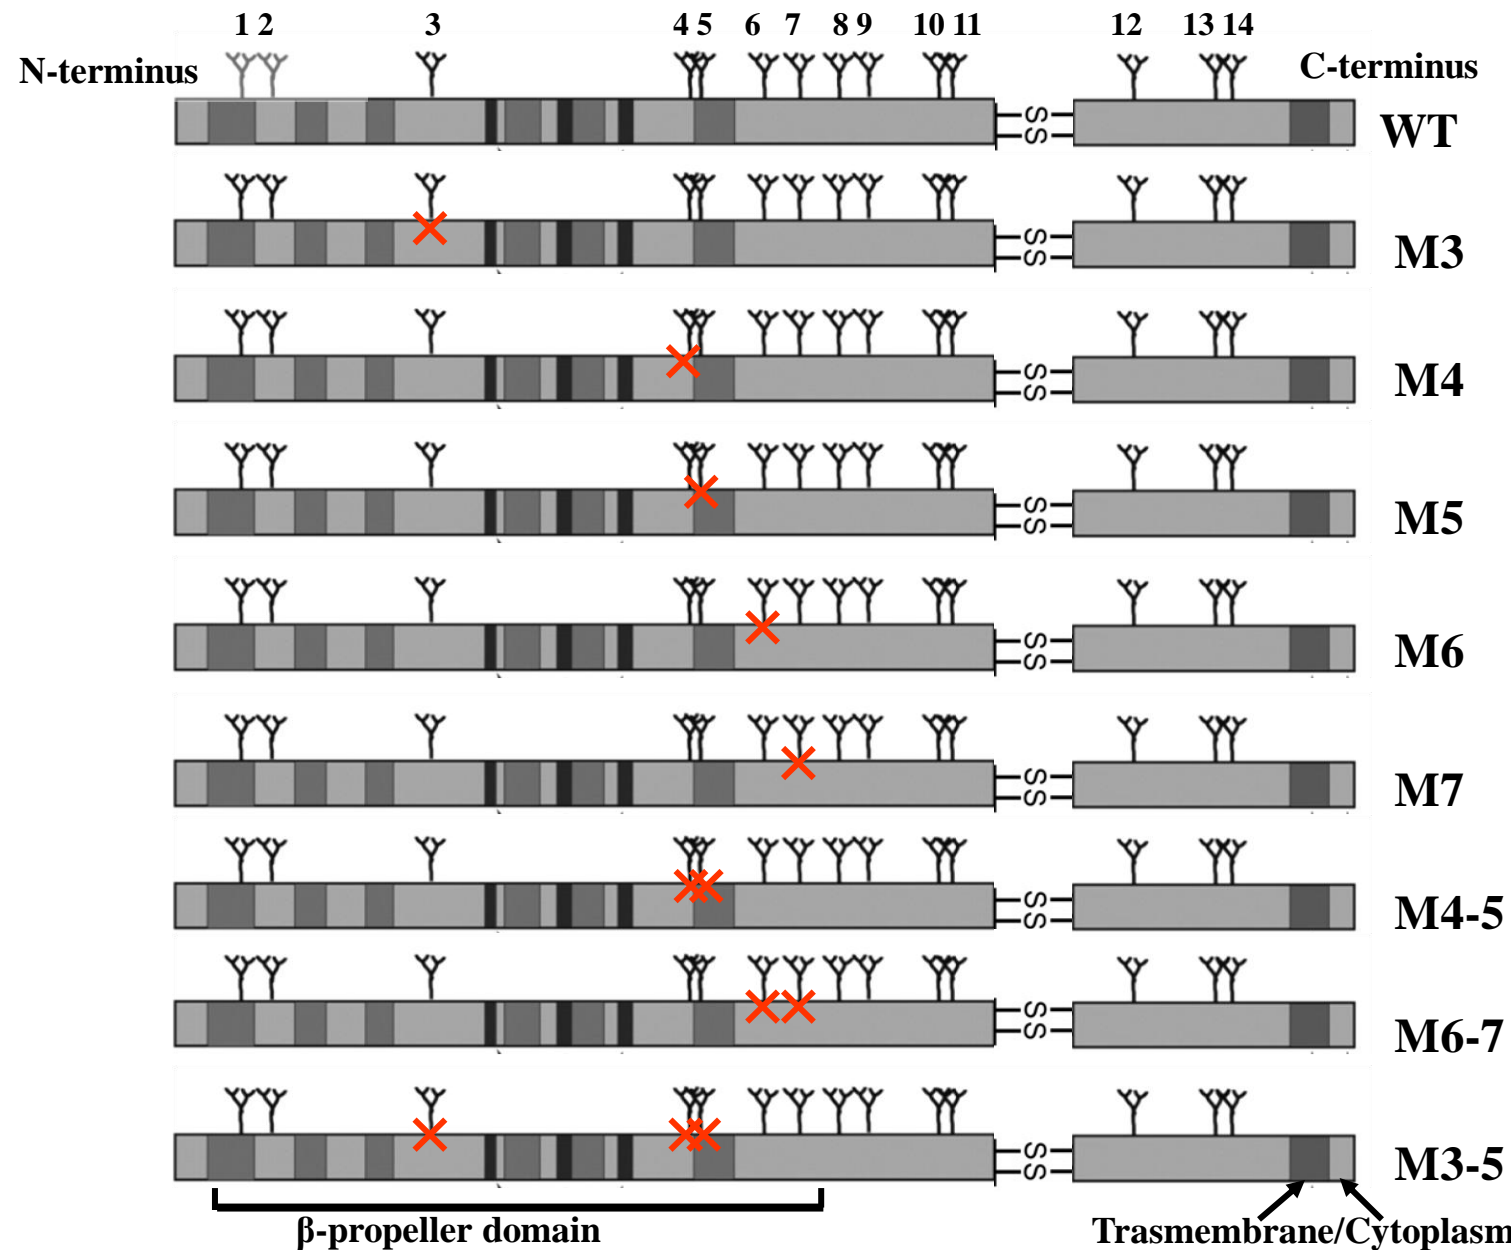

**Supplemental Figure S2. Schematic illustration of the locations of mutated N-glycosylation sites in the ITGA3 subunit.** A total of 14 putative N-glycosylation sites exist in the ITGA3 subunit. Crosses represent the unglycosylation of each N-glycan site by site-directed mutagenesis from N to Q.

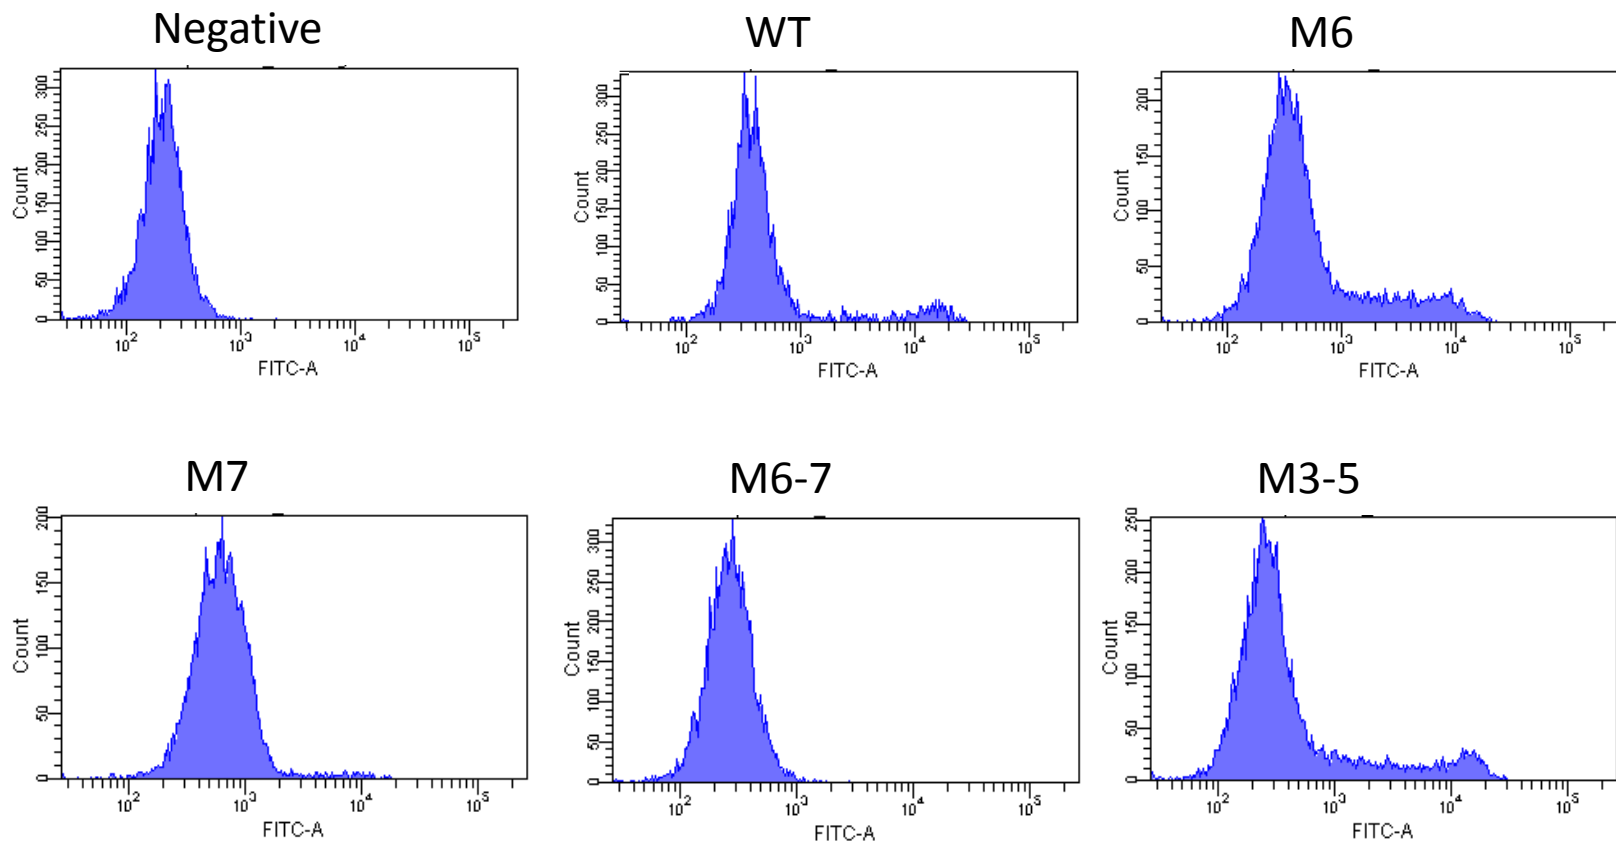

**Supplemental Figure S3: Flow cytometry analysis of membrane ITGA3 expression in the pool of stable cell lines selected by hygromycin B. Only M6-7 had no membrane ITGA3 detected.**

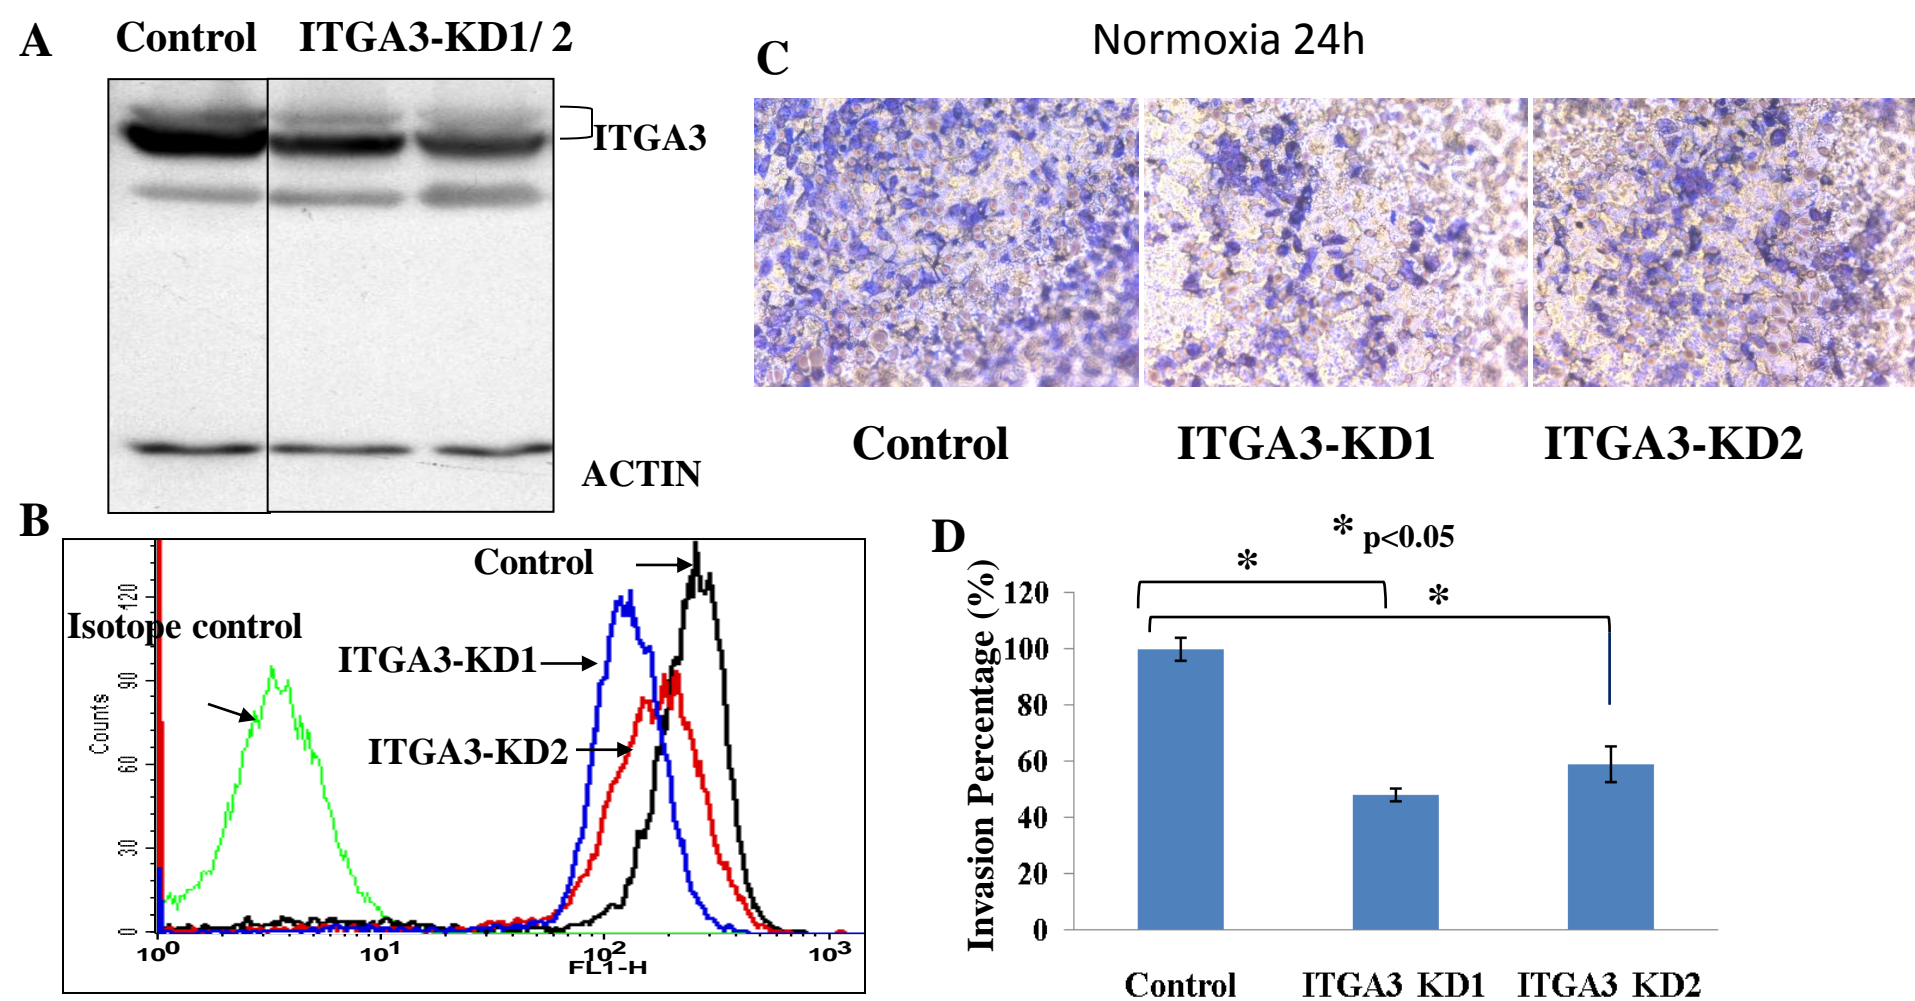

### Supplemental Figure S4: Knockdown of ITGA3 suppressed A431 invasion.

The lower whole and membrane ITGA3 in knockdown cell lines was confirmed by WB and FACS(A and B). The less invasion of knockdown cell lines was observed in transwell invasion assay (C and D). 1 $\mu$ g/ml laminin 5 was coated on the membrane and 5% FBS in the media was added in the lower chambers of transwells. Control: cells transfected with shRNA fragments of Luciferase; ITGA3-KD1/2: the two clones picked up from the cells transfected with ITGA3 shRNA fragments.
